# Supplementary material for: Clinical and Immunologic Efficacy of the Recombinant Adenovirus Type-5-Vectored (CanSino Bio) Vaccine in University Professors during the COVID-19 Delta Wave
Source: MDPI journal article supplement (doi:10.3390/vaccines10050656), 2022-04-21
Supplement: s1 [file s1]

| After vaccination                                                              | CanSino<br><i>n</i> = 72<br><i>n</i> (%) | Pfizer/<br>BioNTech<br><i>n</i> =152<br><i>n</i> (%) | AstraZeneca/<br>Oxford<br><i>n</i> = 167<br><i>n</i> (%) | Sputnik V<br><i>n</i> =2<br><i>n</i> (%) | Janssen/J&J<br><i>n</i> =0<br><i>n</i> (%) | CoronoVac<br><i>n</i> =58<br><i>n</i> (%) | Moderna<br><i>n</i> =4<br><i>n</i> (%) |
|--------------------------------------------------------------------------------|------------------------------------------|------------------------------------------------------|----------------------------------------------------------|------------------------------------------|--------------------------------------------|-------------------------------------------|----------------------------------------|
| Primary breakthrough symptomatic infection                                     |                                          |                                                      |                                                          |                                          |                                            |                                           |                                        |
| Total                                                                          | 3 (4.16)                                 | 2 (1.31)                                             | 7 (4.19)                                                 | 0 (0.00)                                 | 0 (0.00)                                   | 2 (3.44)                                  | 0 (0.00)                               |
| Outpatient                                                                     | 3 (4.16)                                 | 2 (1.31)                                             | 6 (3.59)                                                 | 0 (0.00)                                 | 0 (0.00)                                   | 2 (3.44)                                  | 0 (0.00)                               |
| Hospitalization                                                                | 0 (0.00)                                 | 0 (0.00)                                             | 1 (0.59)                                                 | 0 (0.00)                                 | 0 (0.00)                                   | 0 (0.00)                                  | 0 (0.00)                               |
| Supplemental<br>oxygen                                                         | 0 (0.00)                                 | 1 (0.65)                                             | 1 (0.59)                                                 | 0 (0.00)                                 | 0 (0.00)                                   | 0 (0.00)                                  | 0 (0.00)                               |
| Mechanical<br>ventilation or Death                                             | 0 (0.00)                                 | 0 (0.00)                                             | 0 (0.00)                                                 | 0 (0.00)                                 | 0 (0.00)                                   | 0 (0.00)                                  | 0 (0.00)                               |
| Breakthrough symptomatic re-infection from previously infected participants    |                                          |                                                      |                                                          |                                          |                                            |                                           |                                        |
| Total                                                                          | 0 (0.00)                                 | 0 (0.00)                                             | 1 (0.59)                                                 | 0 (0.00)                                 | 0 (0.00)                                   | 0 (0.00)                                  | 0 (0.00)                               |
| Outpatient                                                                     | 0 (0.00)                                 | 0 (0.00)                                             | 1 (0.59)                                                 | 0 (0.00)                                 | 0 (0.00)                                   | 0 (0.00)                                  | 0 (0.00)                               |
| Hospitalization,<br>Supplemental<br>oxygen, Mechanical<br>ventilation or Death | 0 (0.00)                                 | 0 (0.00)                                             | 0 (0.00)                                                 | 0 (0.00)                                 | 0 (0.00)                                   | 0 (0.00)                                  | 0 (0.00)                               |

**Table S1.** Clinical outcomes of patients presenting COVID-19 breakthrough infections and reinfections after partial vaccination.

| <i>Not vaccinated population</i> | <i>n= 63 (%)</i> |
|----------------------------------|------------------|
| <i>Total</i>                     | 63 (100)         |
| <i>Outpatient</i>                | 62 (98.41)       |
| <i>Hospitalization</i>           | 1 (1.58)         |
| <i>Supplemental oxygen</i>       | 2 (3.17)         |
| <i>Mechanical ventilation</i>    | 0 (0.00)         |
| <i>Death</i>                     | 0 (0.00)         |

**Table S2.** Clinical outcomes of unvaccinated participants.

| After vaccination                                                                                | CanSino<br><i>n</i> = 5,432 | Pfizer/<br>BioNTech<br><i>n</i> =771 | AstraZeneca/<br>Oxford<br><i>n</i> = 633 | Sputnik V<br><i>N</i> =7 | Janssen/J&J<br><i>n</i> =58 | CoronoVac<br><i>n</i> =155 | Moderna<br><i>n</i> =94 |
|--------------------------------------------------------------------------------------------------|-----------------------------|--------------------------------------|------------------------------------------|--------------------------|-----------------------------|----------------------------|-------------------------|
| Primary breakthrough symptomatic infection in fully vaccinated                                   |                             |                                      |                                          |                          |                             |                            |                         |
| Total                                                                                            | 224                         | 14                                   | 10                                       | 0                        | 2                           | 1                          | 2                       |
| Age, mean (SD)                                                                                   | 40.7 (±9.5)                 | 50 (±13.7)                           | 64.8 (±7.1)                              | NA                       | 42.5 (±9.1)                 | 53                         | 51.5 (±4.9)             |
| Female (%)                                                                                       | 107 (47.7)                  | 8 (57.1)                             | 2 (20.0)                                 | 0 (0.00)                 | 1 (50.0)                    | 1 (100.0)                  | 2 (100.0)               |
| Diabetes (%)                                                                                     | 15 (6.6)                    | 2 (14.2)                             | 3 (30.0)                                 | 0 (0.00)                 | 0 (0.00)                    | 1 (100.0)                  | 0 (0.00)                |
| Hypertension (%)                                                                                 | 19 (8.4)                    | 3 (21.4)                             | 1 (10.0)                                 | 0 (0.00)                 | 0 (0.00)                    | 0 (0.00)                   | 0 (0.00)                |
| Obesity (%)                                                                                      | 37 (16.5)                   | 2 (14.2)                             | 2 (20.0)                                 | 0 (0.00)                 | 0 (0.00)                    | 1 (100.0)                  | 0 (0.00)                |
| Breakthrough symptomatic re-infection from previously infected fully vaccinated participants     |                             |                                      |                                          |                          |                             |                            |                         |
| Total                                                                                            | 15                          | 1                                    | 2                                        | 0                        | 0                           | 0                          | 0                       |
| Age, mean (SD)                                                                                   | 37.7 (±9.8)                 | 43                                   | 59.5 (±6.3)                              | NA                       | NA                          | NA                         | NA                      |
| Female (%)                                                                                       | 7 (46.6)                    | 1 (100.0)                            | 1 (50.0)                                 | 0 (0.00)                 | 0 (0.00)                    | 0 (0.00)                   | 0 (0.00)                |
| Diabetes (%)                                                                                     | 1 (6.6)                     | 0 (0.00)                             | 0 (0.00)                                 | 0 (0.00)                 | 0 (0.00)                    | 0 (0.00)                   | 0 (0.00)                |
| Hypertension (%)                                                                                 | 0 (0.00)                    | 0 (0.00)                             | 1 (50.0)                                 | 0 (0.00)                 | 0 (0.00)                    | 0 (0.00)                   | 0 (0.00)                |
| Obesity (%)                                                                                      | 4 (26.6)                    | 0 (0.00)                             | 0 (0.00)                                 | 0 (0.00)                 | 0 (0.00)                    | 0 (0.00)                   | 0 (0.00)                |
| Primary breakthrough symptomatic infection in partially vaccinated                               |                             |                                      |                                          |                          |                             |                            |                         |
| Total                                                                                            | 3                           | 2                                    | 7                                        | 0                        | 0                           | 2                          | 0                       |
| Age, mean (SD)                                                                                   | 45 (±7)                     | 37.5 (±4.9)                          | 48.1 (±6.8)                              | NA                       | NA                          | 46 (±2.8)                  | NA                      |
| Female (%)                                                                                       | 1 (33.3)                    | 0 (0.00)                             | 3 (42.8)                                 | 0 (0.00)                 | 0 (0.00)                    | 1 (50.0)                   | 0 (0.00)                |
| Diabetes (%)                                                                                     | 0 (0.00)                    | 0 (0.00)                             | 2 (28.5)                                 | 0 (0.00)                 | 0 (0.00)                    | 0 (0.00)                   | 0 (0.00)                |
| Hypertension (%)                                                                                 | 1 (33.3)                    | 0 (0.00)                             | 2 (28.5)                                 | 0 (0.00)                 | 0 (0.00)                    | 0 (0.00)                   | 0 (0.00)                |
| Obesity (%)                                                                                      | 0 (0.00)                    | 0 (0.00)                             | 2 (28.5)                                 | 0 (0.00)                 | 0 (0.00)                    | 0 (0.00)                   | 0 (0.00)                |
| Breakthrough symptomatic re-infection from previously infected partially vaccinated participants |                             |                                      |                                          |                          |                             |                            |                         |
| Total                                                                                            | 0                           | 0                                    | 1                                        | 0                        | 0                           | 0                          | 0                       |
| Age, mean (SD)                                                                                   | NA                          | NA                                   | 29                                       | NA                       | NA                          | NA                         | NA                      |
| Female (%)                                                                                       | 0 (0.00)                    | 0 (0.00)                             | 1 (100.0)                                | 0 (0.00)                 | 0 (0.00)                    | 0 (0.00)                   | 0 (0.00)                |
| Diabetes (%)                                                                                     | 0 (0.00)                    | 0 (0.00)                             | 0 (0.00)                                 | 0 (0.00)                 | 0 (0.00)                    | 0 (0.00)                   | 0 (0.00)                |
| Hypertension (%)                                                                                 | 0 (0.00)                    | 0 (0.00)                             | 0 (0.00)                                 | 0 (0.00)                 | 0 (0.00)                    | 0 (0.00)                   | 0 (0.00)                |
| Obesity (%)                                                                                      | 0 (0.00)                    | 0 (0.00)                             | 0 (0.00)                                 | 0 (0.00)                 | 0 (0.00)                    | 0 (0.00)                   | 0 (0.00)                |

**Table S3.** Clinical characteristics of patients presenting COVID-19 breakthrough infections and reinfections according to gender and the most common comorbidities. NA: Not applicable.

|                               | <i>n</i> = 352<br><i>n</i> (%) | <i>S antibody value</i><br><i>mean (SD)</i> |
|-------------------------------|--------------------------------|---------------------------------------------|
| <i>Vaccine</i>                |                                |                                             |
| <i>Cansino</i>                | 311 (88.3)                     | 6,043 ±17,266.8                             |
| <i>Pfizer</i>                 | 20 (5.6)                       | 4,036.1 ±7,586                              |
| <i>AstraZeneca</i>            | 21 (5.9)                       | 244.9 ±188.1                                |
| <i>Group</i>                  |                                |                                             |
| <i>Breakthrough infection</i> | 69 (19.6)                      | 21,483.4 ± 30,28.1                          |
| <i>Reinfection</i>            | 3 (0.8)                        | 3,373.1 ± 2,756.1                           |
| <i>Previous infection</i>     | 61 (17.3)                      | 5,055 ± 6,835.3                             |
| <i>Without infection</i>      | 219 (62.2)                     | 1,420.3 ± 4,700.6                           |

**Table S4.** Number of participants serologically tested and mean S antibody production according to administered vaccine and self-reported COVID-19 infection.
